# Supplementary material for: Comparison of Atmospheric and Lithospheric Culturable Bacterial Communities from Two Dissimilar Active Volcanic Sites, Surtsey Island and Fimmvörðuháls Mountain in Iceland
Source: MDPI journal article supplement (doi:10.3390/microorganisms11030665), 2023-03-06
Supplement: s1 [file s1]

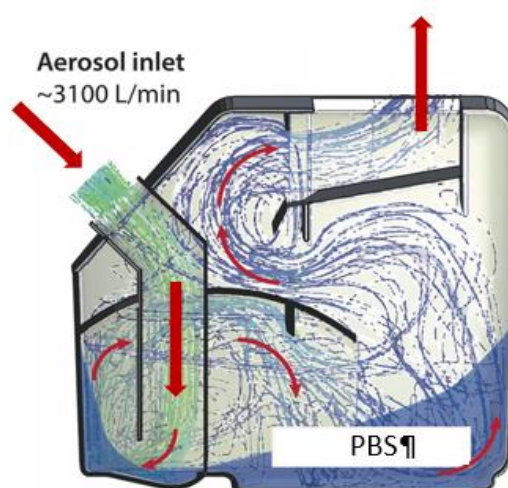

(A)

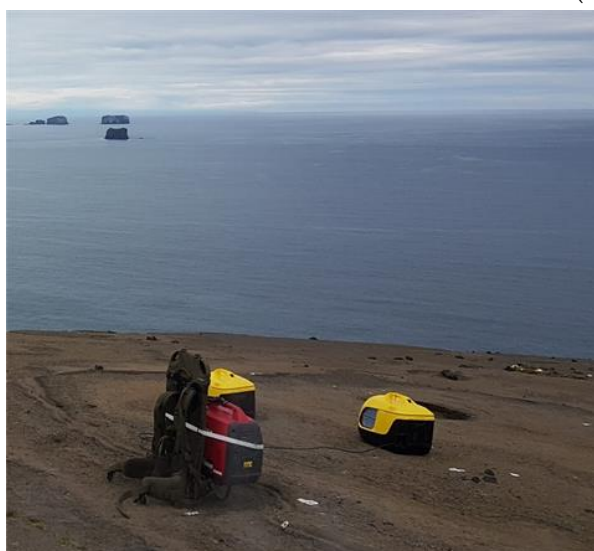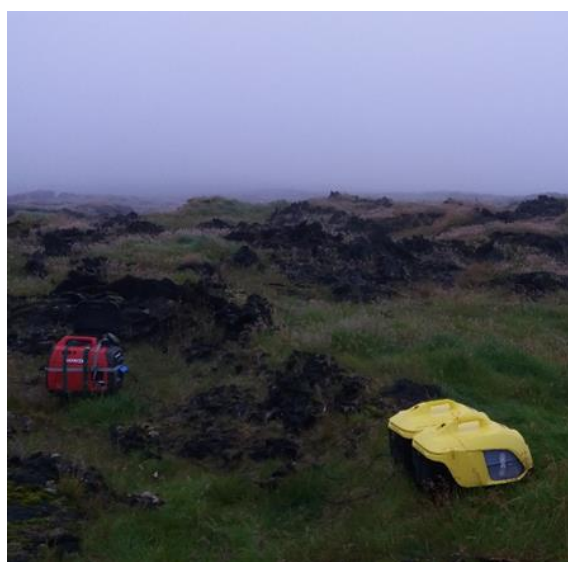

(B)

**Supplementary Material – Figure S1** (A) Schema of the high-flow rate impinger used in this study (modified from Šantl-Temkiv et al., 2017) and (B) pictures of it while in use in Surtsey (left picture: at the Viti station and right picture: at the Mávavarp station).
