# Supplementary material for: Comparison of Atmospheric and Lithospheric Culturable Bacterial Communities from Two Dissimilar Active Volcanic Sites, Surtsey Island and Fimmvörðuháls Mountain in Iceland
Source: Microorganisms. 2023 Mar 6;11(3):665. doi: 10.3390/microorganisms11030665 (PMC10057085; doi:10.3390/microorganisms11030665)
Supplement: Supplementary file 1 [file microorganisms-11-00665-s001.zip › SupplementaryMaterial Table S1.xlsx]

## Sheet: Sheet1
Supplementary material: Table S1. (A) Number of cultivated isolates and selected strains after MSP dendrogram (MALDI). Sequences were aligned against the 16S ribosomal RNA sequences database on BLAST. (B) Results summary
(A)
									Origin
Number			Representative strains		Closest Match on BLAST				18SA		19SA		18FA		19FR		19SR		19FR+
TAXA	Genus	Specie	Strain name	GenBank accession number	ID%	Phylum	Genus	Specie	Isolates	MALDI	Isolates	MALDI	Isolates	MALDI	Isolates	MALDI	Isolates	MALDI	Isolates	MALDI
1	1		19FR+15	OP765854	99.8	Actinobacteria	Arthrobacter	NA							3	3	31	4	1	1
2		1	19FR6	OP765816	98.76			livingstonensis							1	1
3		2	19FR+13	OP765853	100			koreensis											1	1
4	2	3	19FR4	OP765814	99.71		Brachybacterium	nesterenkovii							1	1
5		4	19FR+12	OP765852	100			rhamnosum											1	1
6	3	5	18SA17	OP765717	99.26		Brevibacterium	antiquum	20	1
7	4	6	19SR23	OP765870	99.48		Dermacoccus	nishinomiyaensis									2	2
8	5		18FA9	OP765789	99.84		Kocuria	NA					5	1
9	6	7	19SA80	OP765778	100		Lysinimonas	soli			1	1
10	7		18SA22	OP765720	99.53		Microbacterium	NA	1	1	9	1
11		8	18SA14	OP765714	100			maritypicum		2
12	8		19FR19	OP765824	100		Micrococcus	NA					3	1	20	3	1	1
13		9	19FR32	OP765831	100			aloeverae					1	1	1	1
14		10	19FR42	OP765841	98.95			flavus							2	2
15	9	11	19SR16	OP765865	99.8		Paenarthrobacter	nicotinovorans									2	1
16		12	19SR10	OP765862	100			nitroguajacolicus									8	3
17	10	13	19SR33	OP765879	99.58		Pseudarthrobacter	siccitolerans									1	1
18		14	19SR20	OP765868	98.97			sulfonivorans									5	1
19	11	15	18FA12	OP765792	99.47		Rhodococcus	kyotonensis					60	8
20	12	16	18FA10	OP765790	99.28		Streptomyces	candidus					1	1	1	1
21			19FR+4	OP765844	99.1			NA											2	2
22			19SR42	OP765887	99.71		NA	NA			2	2					3	3
23	13		18FA39	OP765274	99.7	Ascomycota	Saraclodium	NA					1	1
24		17	18FA15	OP765274	99.48			kiliense					5	4
25		18	19SA17	OP765738	100		Flavobacterium	frigidimaris			4	4
26	15		18FA2	OP765782	99.42		Pedobacter	NA					49	2			2	2
27		19	18SA31	OP765725	99.09			nototheniae	2	1
28		20	19SR31	OP765878	99.62			ginsenosidimutans									2	1
29		21	18SA30	OP765724	99.58			roseus		1
30		22	19SA47	OP765753	100			ginsengiterrae			1	1
31	16		19SA23	OP765741	100		Sphingobacterium	NA			109	6
32	17		18SA34V	OP765276	100	Basidiomycota	Naganishia	NA	1	1
33	18	23	18SA34F	OP765275	99.43		Sporobolomyces	blumeae	1	1
34	19	24	19FR17	OP765875	99.78	Deinococcota	Deinococcus	taklimakanensis							1	1	1	1
35	20		18FA11	OP765791	100	Firmicutes	Bacillus	NA					17	5	1	1	6	3
36		25	18FA27	OP765805	100			cereus									12	1
37	21		19SR7	OP765860	99.84		Paenibacillus	NA									5	2
38		26	19SR5	OP765858	99.84			algorifonticola									2	1
39		27	19SR6	OP765859	99.44			liaoningensis									2	1
40	22	28	19FR11	OP765818	100		Staphylococcus	epidermidis							1	1
41		29	19FR30	OP765830	100			warneri							1	1
42	23	30	19FR2	OP765812	99.67		Streptococcus	mitis							2	2
43		31	19FR33	OP765832	100			sanguinis							1	1
44	24	32	19SA31	OP765744	100	Proteobacteria	Albirhodobacter	confluentis			3	1
45	25	33	18FA7	OP765787	99.56		Caballeronia	udeis					26	3
46	26	34	19SA8	OP765733	100		Comamonas	piscis			2	1
47	27		19FR30	OP765830	99.38		Duganella	NA							1	1
48	28	35	19SA79	OP765777	100		Erwinia	billingiae			1	1
49	29	36	19SA32	OP765745	99.79		Janthinobacterium	rivuli	1	1	1	1
50	30	37	19SR22	OP765869	99.01		Massilia	brevitalea							25	1	65	5
51		38	19SR39	OP765883	98.83			niabensis									1	1
52		39	19FR22	OP765825	98.97			eurypsychrophila							3	1
53		40	19FR27	OP765828	99.11			glaciei							2	2
54		41	19FR+1	OP765843	99.2			psychrophila											2	1
55	31	42	19FR13	OP765820	99.83		Moraxella	osloensis					2	1	15	4	1	1
56	32	43	19FR43	OP765842	98.79		Noviherbaspirillum	psychrotolerans							1	1
57	33	44	19SA40	OP765750	99.48		Paracoccus	aquimaris			4	1
58		45	18FA24	OP765802	99.66			yeei					6	1
59		46	18FA17	OP765796	99.92			sanguinis					1	1
60		47	19FR5	OP765815	99.92			marinus							2	2
61	34		18SA1	OP765705	100		Pseudomonas	NA	70	8	51	12
62		48	18SA13	OP765713	100			graminis		2
63		49	18SA5	OP765707	100			marginalis	6	1
64		50	18SA9	OP765709	100			turukhanskensis	1	1
65		51	19SA35	OP765748	99.77			baetica			1	1
66		52	19SA71	OP765772	99.89			cedrina			4	1
67		53	19SA54	OP765758	99.56			guineae			4	1
68		54	19FR12	OP765819	98.98			helmanticensis			5	3			1	1
69		55	19SA55	OP765759	99.41			plecoglossicida			1	1
70		56	19SA52	OP765757	99.29			proteolytica			1	1
71		57	19SA49	OP765754	99.84			trivialis			1	1
72		58	19SA12	OP765735	100			xanthomarina			1	1
73		59	19SA5	OP765732	100			zhaodongensis			7	2
74		60	18FA37	OP765809	99.4			caspiana					42	2
75	35		19SA1	OP765730	99.72		Psychrobacter	NA			1	1
76		61	19SA3	OP765731	100			namhaensis			2	1
77	36		19SA58	OP765761	100		Serratia	NA			2	1
78		62	19SA65	OP765766	99.81			proteamaculans			15	1
79	37	63	19SA78	OP765776	100		Shewanella	hafniensis			1	1
80	38		18SA15	OP765715	100		Sphingomonas	NA		2
81		64	18SA19	OP765729	99.82			glacialis		2									5	5
82		65	19FR+6	OP765846	100			psychrolutea											1	1
83	39	66	18SA18	OP765718	98.85		Stenotrophomonas	chelatiphaga		2
84		67	19SA20	OP765739	99.92			rhizophila			10	2
85			18SA16	OP765716	100		Various - Beta proteobacteria	NA	1	1					1	1
86			18FA8	OP765788	100		Various : class. Proteobacteria	NA					4	1
87			19SA25	OP765742	100		Various - Phy.Proteobacteria	NA			1	1
88	40	68	19SA39	OP765749	100		Variovorax	boronicumulans			1	1	1	1
									Isolates	MALDI	Isolates	MALDI	Isolates	MALDI	Isolates	MALDI	Isolates	MALDI	Isolates	MALDI
	LEGEND							Total	104	28	246	53	224	34	87	33	152	35	13	12
	19FR	2019 Fimmvörðuháls 1-year-old Rocks						Origin	18SA		19SA		18FA		19FR		19SR		19FR+
	19SR	2019 Surtsey 1-year-old Rocks
	19SA	2019 Surstey Air
	19FR+	2019 Fimmvörðuháls 9-years-old Rocks
	18SA	2018 Surstey Air
	18FA	2018 Fimmvörðuháls Air
	MALDI	Selected strain after MSP dendrogram
	Isolates	Number of cultivated isolates
(B)
			After MALDI		<98,65				After trim
	Samples	Isolates	Groups	Seq OUT	Novel				T Groups	Genera	Av Quality (%)	Av size (bp)
18SA	8	104	40	10	2				28	9	98.45	660
19SA	8	246	85	24	5				56	17	98.9	548
18FA	6	224	43	1	7				35	14	99.3	511
19FR	6	87	43	0	6				37	15	99.9	559
19SR	8	152	43	4	4				35	13	99.5	660
19FR+	2	13	15	1	2				12	6	99.8	453
Total	38	826	269	40	26				203	74	99.3083	565.167
Check*		797
	*29 strains in common between 19SR and 19FR (same MALDI group)
